# Supplementary material for: Lipo-chitooligosaccharides as regulatory signals of fungal growth and development
Source: PubMed Central journal article supplement (PMC7403392; doi:10.1038/s41467-020-17615-5), 2020-08-04
Supplement: 41467_2020_17615_MOESM2_ESM.pdf [file 41467_2020_17615_MOESM2_ESM.pdf]

## DESCRIPTION OF ADDITIONAL SUPPLEMENTARY FILES

**Supplementary Data 1: Origin of fungal and oomycete cultures**

**Supplementary Data 2: Culture conditions and media used**

**Supplementary Data 3: Taxonomic affiliation and lifestyle**

**Supplementary Data 4: Number of root hair branches per treatment and controls.** The total number of root hair branches observed in 3-cm of root were recorded for a minimum of five replications per fungal and oomycete species and controls tested on *Medicago truncatula* and *Vicia sativa*. Chitooligosaccharides and fatty acids had a concentration of  $10^{-8}$  M. Positive controls are an application of a concentration of  $10^{-8}$  M of (ns)LCOs on *V. sativa* and (s)LCOs on *M. truncatula*. Broth media were also examined.

**Supplementary Data 5:** Database listing all possible mass-to-charge ratios (precursors/products ions) calculated from known LCOs.

**Supplementary Data 6: List of Gene Ontology (GO) Enrichment Terms and Differentially Expressed Genes for 30- and 120-minutes post inoculation.** The GO Enrichment terms were separated into three functions: biological process, cellular component, and molecular function. Significant DEGs with genes expressed with a p-value  $<0.05$  after 30 minutes or after 120 minutes.

**Supplementary Data 7: GO Enrichment Terms 30- and 120-minutes post inoculation:**

**Supplementary Data 8: DEGs in KEGG pathway after 120 minutes post inoculation**

**Supplementary Movie 1: Formation of pseudohyphae and swollen cells in *Candida glabrata***  
Swollen cells and pseudohyphae observed 10 hours after treatment with  $10^{-8}$  M C18:1 sulfated LCOs. Time-lapse bright field microscopy was used. Scale bar is 50  $\mu\text{m}$ .

**Supplementary Movie 2: A closer view of pseudohyphae formation in *Candida glabrata***  
Pseudohyphae were observed 10 hours after treatment with  $10^{-9}$  M C16:0 sulfated LCOs. Time-lapse bright field microscopy was used. Scale bar is 10  $\mu\text{m}$ .

**Supplementary Movie 3: Z-Stack of extensive pseudohyphae formation in *Candida glabrata***  
3D image constructed from a z stack showing extensive pseudohyphae formation 10 hours after treatment with  $10^{-9}$  M C16:0 sulfated LCOs. Time-lapse bright field microscopy was used. The X-axis shows increments of 50  $\mu\text{m}$  (up to a total of 233  $\mu\text{m}$ ) as the scale bar at 40X magnification.
